# Supplementary material for: Repurposing the Kinase Inhibitor Mavelertinib for Giardiasis Therapy
Source: PubMed Central journal article supplement (PMC9295539; doi:10.1128/aac.00017-22), 2022-06-15
Supplement: aac.00017-22-s0001.pdf [file aac.00017-22-s0001.pdf]

Supplementary Fig 1

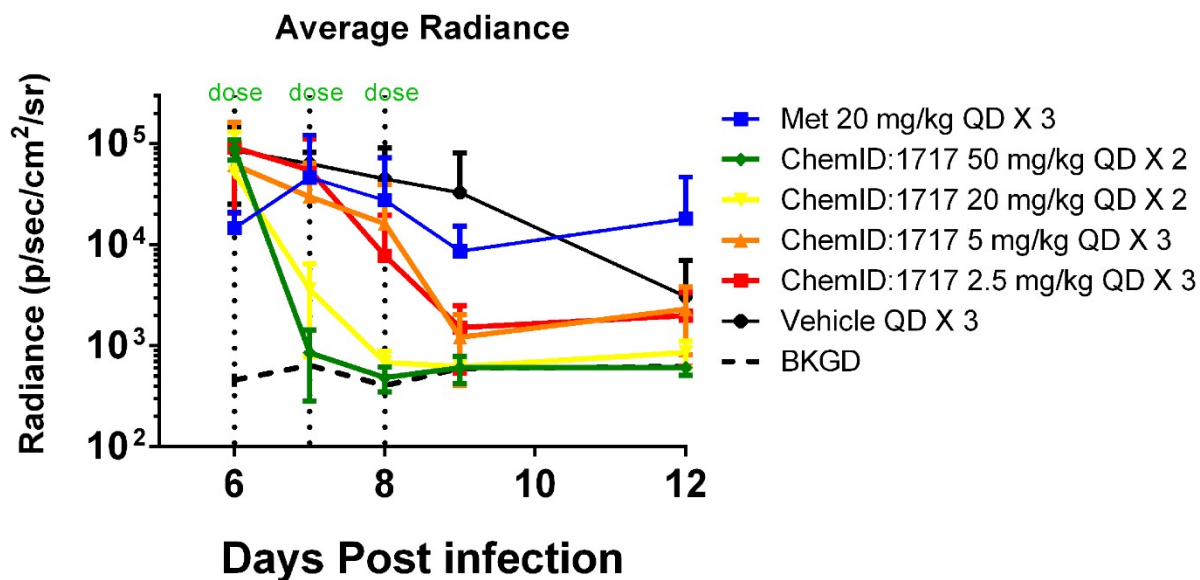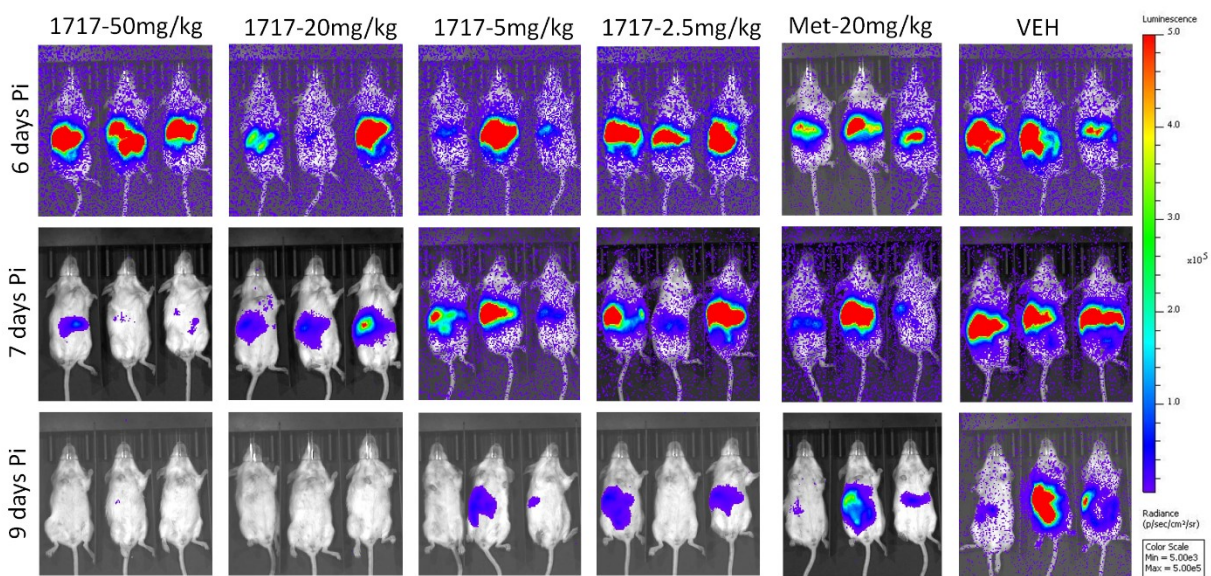

**Fig S1: Radiance plot and mouse images before and after treatment with Compound-1717:** Compound-1717 was dosed at 50 mg/kg x2 days, 20 mg/kg QD x2 days, 5 mg/kg QD x3 days, and 2.5 mg/kg QD x3 days. The infection was cleared in the 50 and 20 mg/kg QD x2 days groups, while the 5 mg/kg and 2.5 mg/kg QD x3 days did not.
